# Supplementary material for: CD44 + cells determine fenofibrate‐induced microevolution of drug‐resistance in prostate cancer cell populations
Source: PubMed Central journal article supplement — Stem Cells. 2020 Oct 2;38(12):1544–56. doi: 10.1002/stem.3281 (PMC7756969; doi:10.1002/stem.3281), 2020-10-02
Supplement: STEM-38-1544-s001.pdf [file STEM-38-1544-s001.pdf]

## Supplementary material

### CD44<sup>+</sup> cells determine fenofibrate-induced microevolution of drug-resistance in prostate cancer cell populations

Tomasz Wróbel<sup>1</sup>, Marcin Luty<sup>1</sup>, Jessica Catapano<sup>1</sup>, Elżbieta Karnas<sup>1</sup>, Małgorzata Szczygieł<sup>2</sup>, Katarzyna Piwowarczyk<sup>1</sup>, Damian Ryszawy<sup>1</sup>, Grażyna Drabik<sup>3</sup>, Ewa Zuba-Surma<sup>1</sup>, Maciej Siedlar<sup>4</sup>, Zbigniew Madeja<sup>1</sup>, Martyna Elas<sup>2</sup> and Jarosław Czyż<sup>1</sup>

<sup>1</sup>Department of Cell Biology, Faculty of Biochemistry, Biophysics and Biotechnology, Jagiellonian University, ul. Gronostajowa 7, 30-387 Kraków, Poland;

<sup>2</sup>Department of Biophysics, Faculty of Biochemistry, Biophysics and Biotechnology, Jagiellonian University, ul. Gronostajowa 7, 30-387 Kraków, Poland;

<sup>3</sup>Department of Transplantology, Institute of Paediatrics, Faculty of Medicine, Jagiellonian University Medical College, 265 Wielicka Str., 30-663 Kraków, Poland;

<sup>4</sup>Department of Clinical Immunology, Institute of Paediatrics, Faculty of Medicine, Jagiellonian University Medical College, 265 Wielicka Str., 30-663 Kraków, Poland.

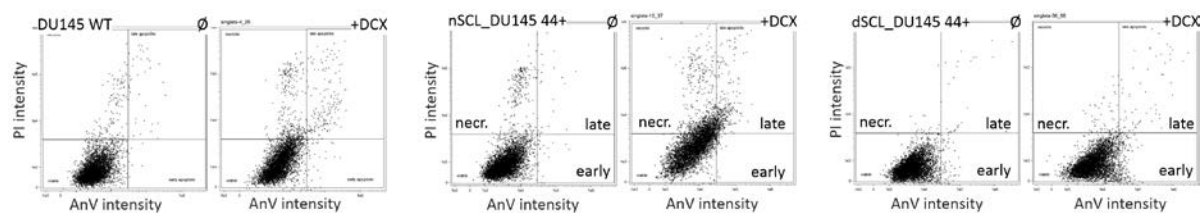

**Figure S1.** Pro-apoptotic activity of 10 nM DCX in the populations of WT, nSCL\_ and dSCL\_DU145 cells (cf. Figure 1F). Compensated plots comprise 50 000 annexinV/PI stained cells, classified based on their bright field ratios. Data representative of at least three independent experiments ( $N \geq 3$ ). **Note the DCX-resistance of the "bulk" progenies of DCX-pretreated dSCL\_DU145 cells.**

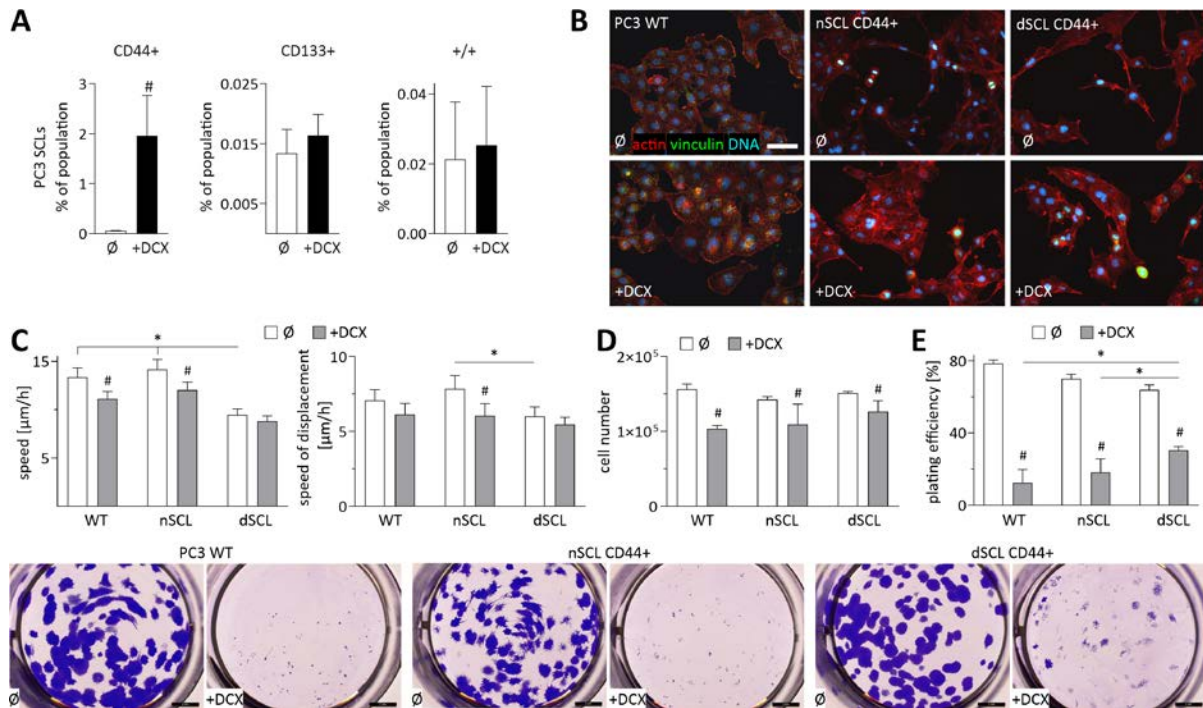

**Figure S2. Potential of CD44<sup>+</sup> PC3 SCL cells.** (A) PC3 cells, cultivated for 48 hours in control conditions or in the presence of DCX (10 nM), were classified based on their bright-field ratios and CD133/CD44 levels. The values in the plots represent relative SCL fractions calculated from the compensated dot-plots comprising 50 000 events. (B) Morphology of the progenies of CD44<sup>+</sup> PC3 cells isolated after pre-incubation in the absence (nSCL\_PC3) or presence of DCX (10 nM, dSCL\_PC3). Cells were cultivated for 2-6 passages and their morphology/actin cytoskeleton architecture was estimated in the absence or presence of DCX (10 nM) with fluorescence microscopy. Scale bar = 50  $\mu$ m. (C) Motility of nSCL\_PC3 and dSCL\_PC3 cells cultivated in the absence/presence of DCX. Column charts show movement parameters at the population level, registered for 8 hours (N>50) with time-lapse videomicroscopy. (D) Proliferation of nSCL\_PC3 and dSCL\_PC3 cells cultivated in the absence/presence of DCX for 48 hours estimated with Coulter counter. (E) CD44<sup>+</sup> SCLs were isolated, propagated, and their direct progenies were seeded (500/cm<sup>2</sup>), stained with CBB R250 and assessed towards clonogenic potential (72 hours). Scale bar = 2 mm. The statistical significance of the differences was tested with t-Student test (A, D, E); #  $p \leq 0.05$  vs. untreated control; \* $p \leq 0.05$  vs. selected bars; or by one-way ANOVA followed by post-hoc Tukey's HSD (C); #  $p \leq 0.05$  vs. untreated control; \* $p \leq 0.05$  vs. selected bars. **Note the DCX-induced drug-resistance of CD44<sup>+</sup> PC3 cell progenies accompanied by their lower plating efficiency in the presence of DCX.**

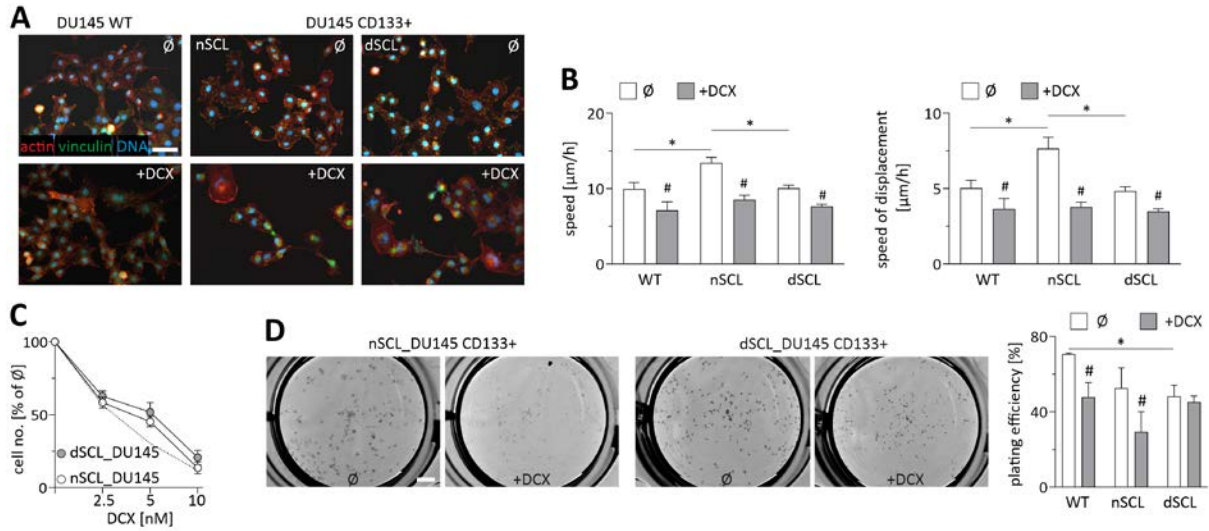

**Figure S3. Potential of CD133<sup>+</sup> DU145 cells.** (A) Morphology of the progenies of CD133<sup>+</sup> DU145 cells isolated after pre-incubation in the absence (nSCL\_DU145\_CD133<sup>+</sup> cells) or presence of DCX (10 nM, dSCL\_DU145\_CD133<sup>+</sup> cells). Cells were cultivated for 2-6 passages and their morphology/actin cytoskeleton architecture was estimated in the absence or presence of DCX (10 nM) with fluorescence microscopy. Scale bar = 50  $\mu\text{m}$ . (B) Motility of nSCL\_DU145\_CD133<sup>+</sup> and dSCL\_DU145\_CD133<sup>+</sup> cells cultivated in the absence/presence of DCX. Column charts show movement parameters at the population level, registered for 8 hours (N>50) with time-lapse videomicroscopy. (C) Proliferation of nSCL\_DU145\_CD133<sup>+</sup> and dSCL\_DU145\_CD133<sup>+</sup> cells cultivated in the absence/presence of DCX for 48 hours estimated with Coulter counter. Dotted line indicates proliferation of wtDU145 cells. (D) Clonogenic capacity of CD133<sup>+</sup> SCLs. Cells were isolated, propagated, and their direct progenies were seeded (500/cm<sup>2</sup>), stained with CBB R250 and assessed towards clonogenic potential (72 hours). Scale bar = 2 mm. The statistical significance of the differences was tested with t-Student test (C, D); #  $p \leq 0.05$  vs. untreated control; \* $p \leq 0.05$  vs. selected bars; or by one-way ANOVA followed by post-hoc Tukey's HSD (B); #  $p \leq 0.05$  vs. untreated control; \* $p \leq 0.05$  vs. selected bars. **Note DCX-induced increase of the relative drug-resistance of CD133<sup>+</sup> DU145 cell progenies.**

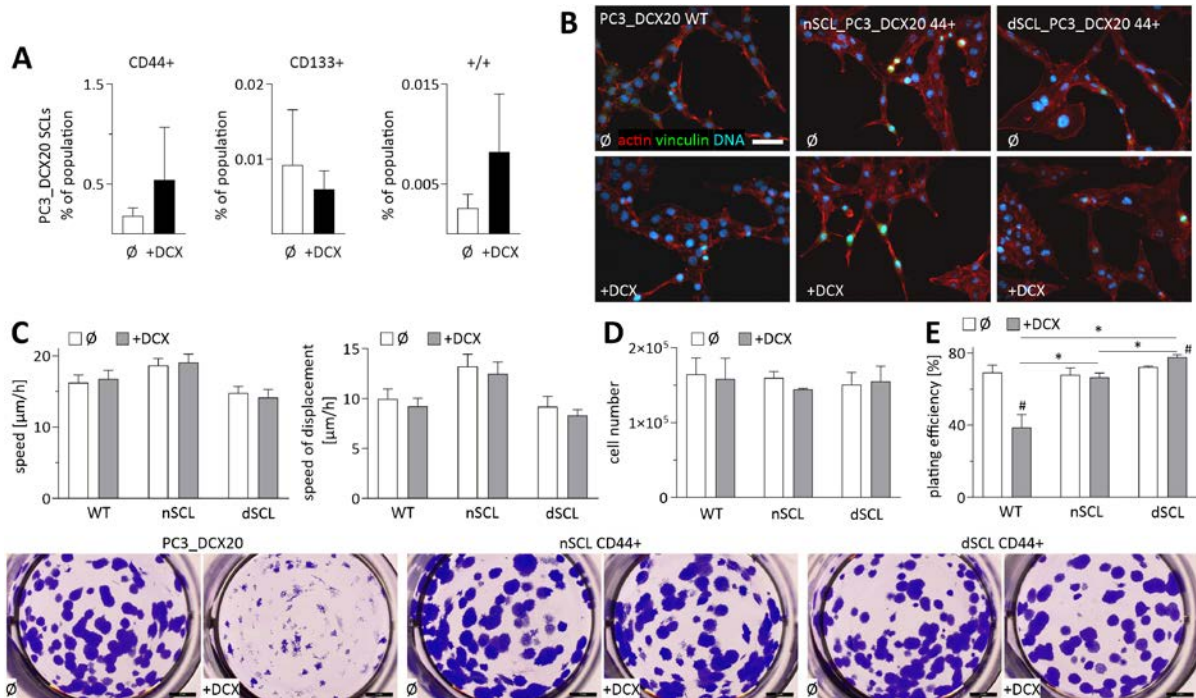

**Figure S4. Potential of CD44<sup>+</sup> PC3\_DCX20 SCL cells.** (A) PC3\_DCX20 cells, cultivated for 48 hours in control conditions or in the presence of DCX (10 nM), were classified based on their bright-field ratios and CD133/CD44 levels. The values in the plots represent relative SCL fractions calculated from the compensated dot-plots comprising 50 000 events. (B) Morphology of the progenies of CD44<sup>+</sup> PC3\_DCX20 cells isolated after pre-incubation in the absence (nSCL\_PC3 or presence of DCX (10 nM, dSCL\_PC3). Cells were cultivated for 2-6 passages and their morphology/actin cytoskeleton architecture was estimated in the absence or presence of DCX (10 nM) with fluorescence microscopy. Scale bar = 50  $\mu$ m. (C) Motility of nSCL\_PC3\_DCX20 and dSCL\_PC3\_DCX20 cells cultivated in the absence/presence of DCX. Column charts show movement parameters at the population level, registered for 8 hours (N>50) with time-lapse videomicroscopy. (D) Proliferation of nSCL\_PC3 and dSCL\_PC3\_DCX20 cells cultivated in the absence/presence of DCX for 48 hours estimated with Coulter counter. (E) CD44<sup>+</sup> SCLs were isolated, propagated, and their direct progenies were seeded (500/cm<sup>2</sup>), stained with CBB R250 and assessed towards clonogenic potential (72 hours). Scale bar = 2 mm. The statistical significance of the differences was tested with t-Student test (A, D, E); #  $p \leq 0.05$  vs. untreated control; \* $p \leq 0.05$  vs. selected bars; or by one-way ANOVA followed by post-hoc Tukey's HSD (C); #  $p \leq 0.05$  vs. untreated control; \* $p \leq 0.05$  vs. selected bars. **CD44<sup>+</sup> PC3\_DCX20 cell progenies display similar drug-resistance to their maternal cells.**

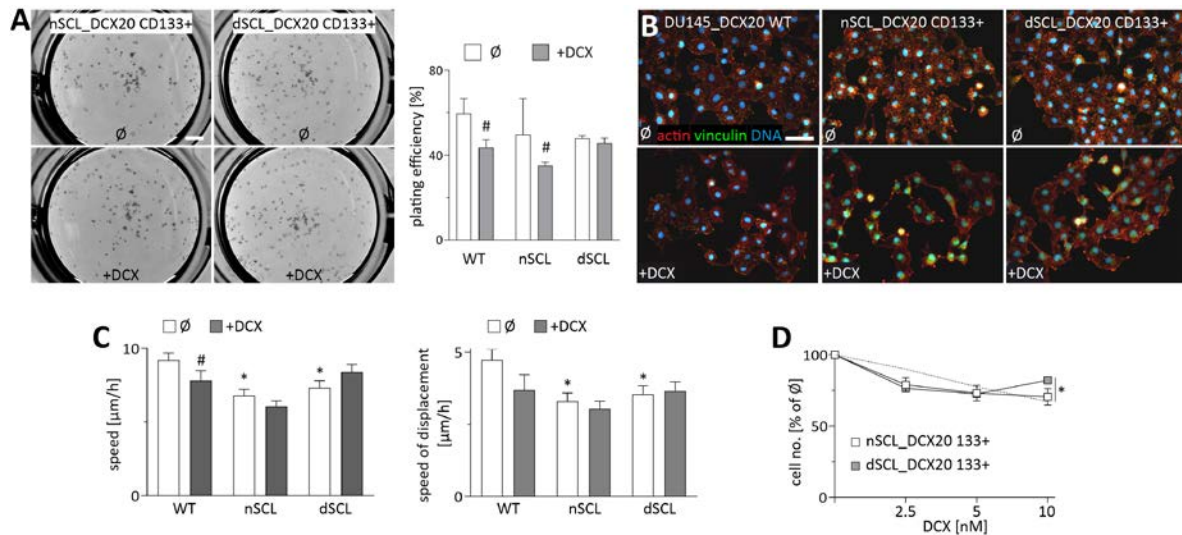

**Figure S5. Potential of CD133<sup>+</sup> DU145\_DCX20 cells.** (A) Plating efficiency of CD133<sup>+</sup> DU145\_DCX20 cells isolated after pre-incubation in the absence (nSCL\_DCX20\_CD133<sup>+</sup> cells) or presence of DCX (10 nM, dSCL\_DCX20\_CD133<sup>+</sup> cells). Cells were isolated, propagated, and their direct progenies were seeded (500/cm<sup>2</sup>), stained with CBB R250 and assessed towards clonogenic potential (72 hours). Scale bar = 2 mm. (B) Morphology of nSCL\_DCX20\_CD133<sup>+</sup> and SCL\_DCX20\_CD133<sup>+</sup> cells. Cells were cultivated for 2-6 passages and their morphology/actin cytoskeleton architecture was estimated in the absence or presence of DCX (10 nM) with fluorescence microscopy. Scale bar = 50 μm. (C) Motility of nSCL\_DCX20\_CD133<sup>+</sup> and SCL\_DCX20\_CD133<sup>+</sup> cells cultivated in the absence/presence of DCX. Column charts show movement parameters at the population level, registered for 8 hours (N>50) with time-lapse videomicroscopy. (D) Proliferation of nSCL\_DCX20\_CD133<sup>+</sup> and SCL\_DCX20\_CD133<sup>+</sup> cells cultivated in the absence/presence of DCX for 48 hours estimated with Coulter counter in relation to wt control (dotted line). The statistical significance of the differences was tested with t-Student test (A, D); # p ≤ 0.05 vs. untreated control; \*p ≤ 0.05 vs. selected bars; or by one-way ANOVA followed by post-hoc Tukey's HSD (C); # p ≤ 0.05 vs. untreated control; \*p ≤ 0.05 vs. selected bars. **CD133<sup>+</sup> DU145\_DCX20 progenies display similar drug-resistance to their maternal cells.**



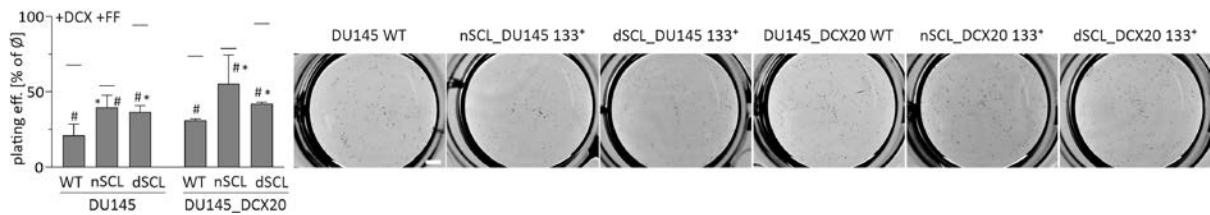

**Figure S6. Effect of the combined DCX/FF treatment on the plating efficiency of CD133<sup>+</sup> DU145\_DCX20 SCLs.** Cells were isolated, propagated, and their progenies were seeded (500/cm<sup>2</sup>), stained with CBB R250 and assessed towards clonogenic activity (72 hours) in comparison to DCX control (horizontal dotted lines). The statistical significance of the differences was tested with t-Student test; # p ≤ 0.05 vs. untreated control; \*p ≤ 0.05 vs. selected bars. **Note the inhibition of DU145\_DCX20 SCL clonogenic activity by the combined DCX/FF treatment.**

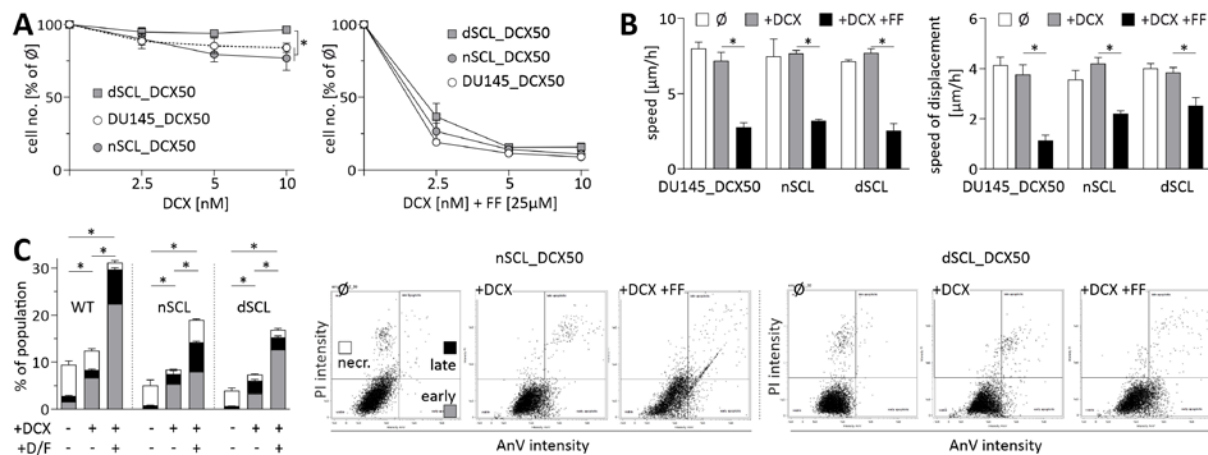

**Figure S7. Effect of fenofibrate on the sensitivity of DU145\_DCX50, nSCL\_DCX50 and dSCL\_DCX50 cells to DCX.** (A) Progenies of SCLs derived from DU145\_DCX50 cells were exposed to DCX or DCX/FF treatment for 48 hours. Their proliferation was then estimated with Coulter counter. (B-C) Progenies of SCLs derived from DU145\_DCX50 cells were exposed to DCX or to the combined DCX/FF treatment. Their motility (B) and apoptosis (C) was estimated with time-lapse videomicroscopy and flow cytometry after 48 hours (B) or 72 hours (C). Column charts in (B) show movement parameters at the population level (registered for 8 h; N>50; plotted as % of control). Compensated dot-plots of annexinV/PI staining in C comprise 50 000 cells, classified based on their bright field ratios. Data representative of at least three independent experiments (N>3). The statistical significance of the differences was tested with t-Student test (A, C); \* $p \leq 0.05$  vs. selected bars; or by one-way ANOVA followed by post-hoc Tukey's HSD (B); \* $p \leq 0.05$  vs. selected bars. **Note relatively high sensitivity of DU145\_DCX50, nSCL\_DCX50 and dSCL\_DCX50 cells to the combined DCX/FF treatment.**

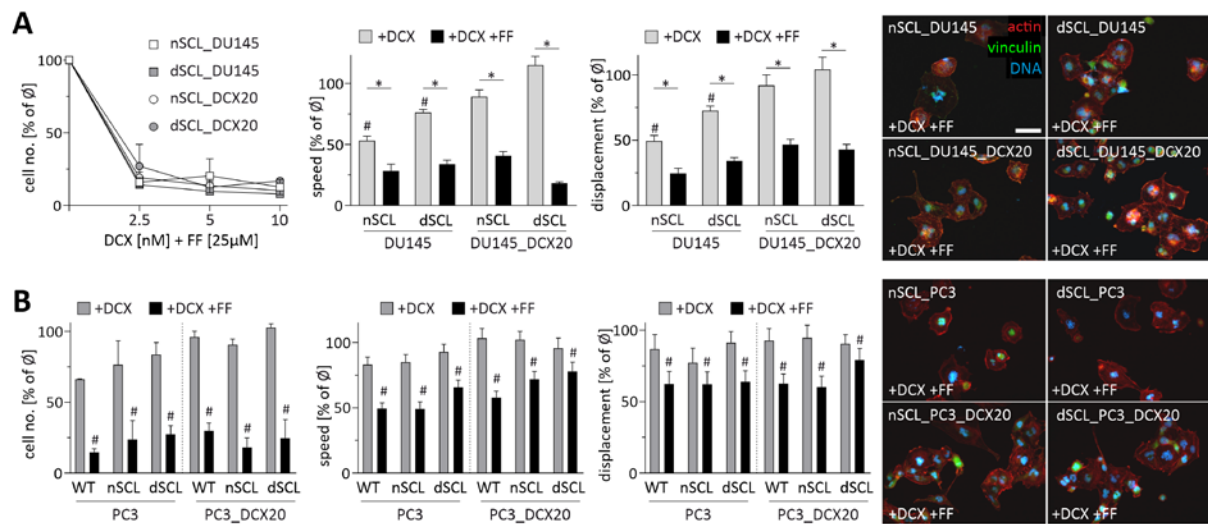

**Figure S8. Effect of fenofibrate on the sensitivity of the progenies of CD133<sup>+</sup> DU145 and CD44<sup>+</sup> PC3 cells to DCX.** Progenies of CD133<sup>+</sup> SCLs derived from DU145/DU145\_DCX20 cells (**A**) or progenies of CD44<sup>+</sup> PC3/PC3\_DCX20 cells (**B**) were exposed to DCX (10 nM) or to the combined DCX/FF treatment (10 nM/25 μM for 48 hours). Their proliferation (left) and motility (middle) was estimated with Coulter counter, and time-lapse videomicroscopy. Column charts show movement parameters (speed and displacement) at the population level (registered for 8 h; N>50; plotted as % of control). Cell morphology (right) was visualized by actin/vinculin staining and fluorescence microscopy. Scale bar = 50 μm. The statistical significance of the differences was tested with t-Student test (proliferation); # p ≤ 0.05 vs. untreated control; or by one-way ANOVA followed by post-hoc Tukey's HSD (motility); # p ≤ 0.05 vs. untreated control; \*p ≤ 0.05 vs. selected bars. **Note the prominent cytostatic effects of DCX/FF and the differences in the reactivity of CD133<sup>+</sup> DU145 and CD44<sup>+</sup> PC3 progenies to the combined DCX/FF treatment.**



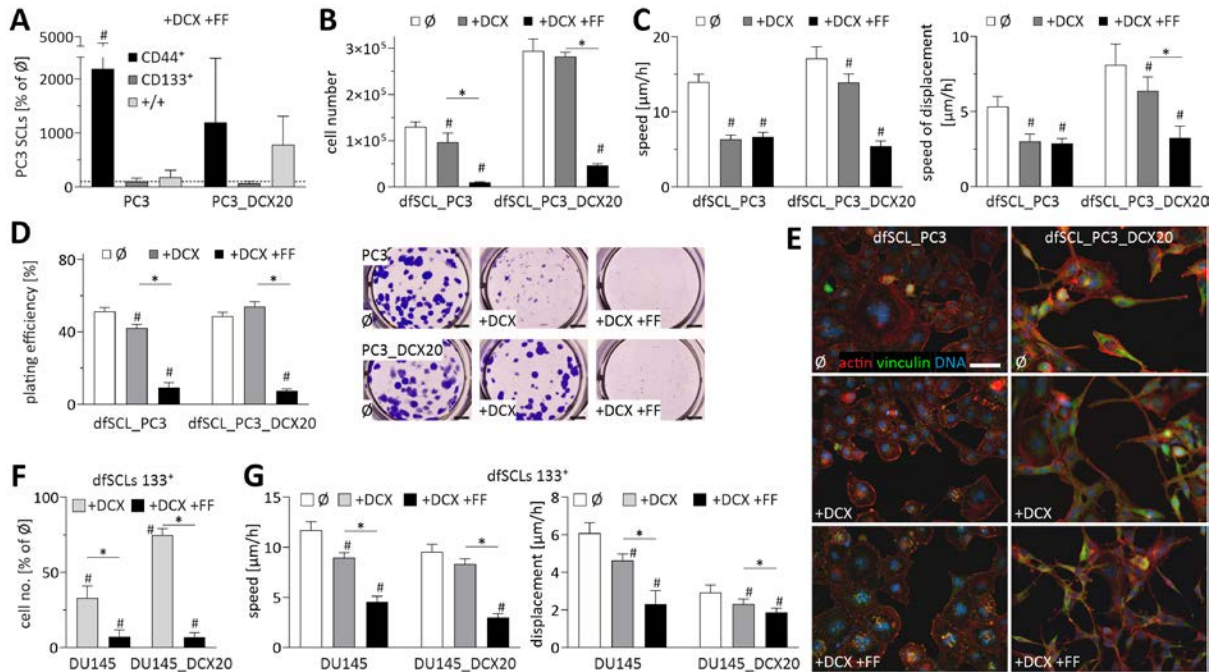

**Figure S9. Effect of FF on the potential of CD44<sup>+</sup> PC3 and CD133<sup>+</sup> DU145 cells to generate DCX/FF-resistant offspring.** (A) PC3 cells, cultivated for 48 hours in control conditions or in the presence of DCX (10 nM), were classified based on their bright-field ratios and CD133/CD44 levels. The values in the plots represent relative SCL fractions calculated from the compensated dot-plots comprising 50 000 events. (B, C) Progenies of DCX/FF-treated CD44<sup>+</sup> SCLs derived from PC3/PC3\_DCX20 cells were exposed to DCX (10 nM) or to the combined DCX/FF (10 nM/25 µM) treatment. Their proliferation (B) and motility (C) was estimated after 48 hours with Coulter counter and time-lapse videomicroscopy. (D) Effect of the combined DCX/FF treatment on the plating efficiency of PC3/PC3\_DCX20 SCLs. Cells were isolated, propagated, and their progenies were seeded (500/cm<sup>2</sup>), stained with CBB R250 and assessed towards clonogenic activity (72 hours). Scale bar = 2 mm. (E) Morphology of dfSCL\_PC3\_DCX20 and dfSCL\_PC3\_DCX20 cells under DCX/FF stress. Cell morphology/actin cytoskeleton architecture was estimated in the absence or presence of DCX/FF with fluorescence microscopy. Scale bar = 50 µm. (F, G) Progenies of DCX/FF-treated CD133<sup>+</sup> SCLs derived from DU145/DU145\_DCX20 cells were exposed to DCX (10 nM) or to the combined DCX/FF (10 nM/25 µM) treatment. Their proliferation (F) and motility (G) was estimated after 48 hours with Coulter counter and time-lapse videomicroscopy, respectively. Column charts (in C and G) show movement parameters at the population level (registered for 8 h; N>50; plotted as % of control). The statistical significance of the differences was tested with t-Student test (A, B, D, F); # p ≤ 0.05 vs. untreated control; \*p ≤ 0.05 vs. selected bars or by one-way ANOVA followed by post-hoc Tukey's HSD (C, G); # p ≤ 0.05 vs. untreated control; \*p ≤ 0.05 vs. selected bars. **Note that DCX/FF-induced preselection of CD133<sup>+</sup> DU145 and CD44<sup>+</sup> PC3 cells does not result in increased DCX/FF resistance of their offspring.**
